# Supplementary material for: mTORC1-Sch9 regulates hydrogen sulfide production through the transsulfuration pathway
Source: publisher site journal article supplement (doi:10.18632/aging.102327), 2019-10-03
Supplement: Supplementary file [file aging-v11i19-102327-supplementary-material-SD1.pdf]

## SUPPLEMENTARY FIGURE

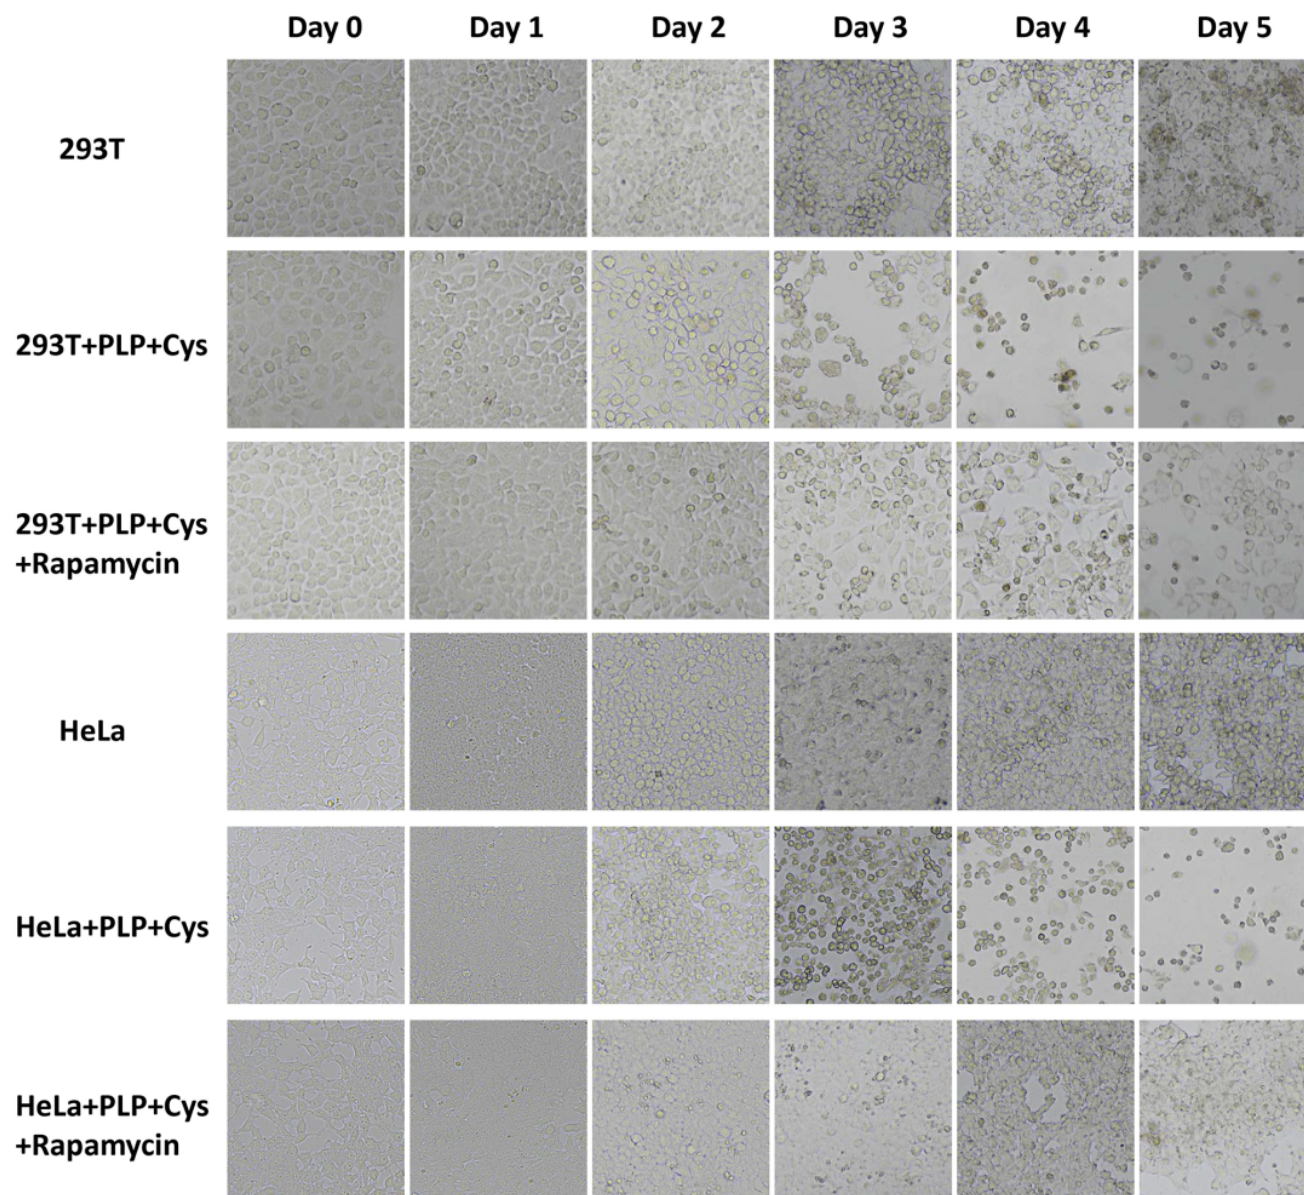

**Supplementary Figure 1. Density of 293T and HeLa cells during the assay for H2S production.** 293T or HeLa cells were cultured for 5 days with or without PLP, cysteine and rapamycin as indicated. Cell density was monitored every 24 hours using inverted microscope.
